# Supplementary material for: Near-field electrospinning enhances the energy harvesting of hollow PVDF piezoelectric fibers
Source: Royal Society of Chemistry journal article supplement (doi:10.1039/c5ra16604g), 2015-01-01
Supplement: c5ra16604g1.pdf [file c5ra16604g1.pdf]

**Supporting Information for**  
**Near-Field Electrospinning Enhances the Energy Harvesting of Hollow PVDF**  
**Piezoelectric Fibers**

Cheng-Tang Pan<sup>a</sup>, Chung-Kun Yen<sup>a</sup>, Shao-Yu Wang<sup>a</sup>, Yan-Cheng Lai<sup>a</sup>, Liwei Lin<sup>b</sup>,  
Jacob Chih-Ching Huang<sup>c</sup>, and Shiao-Wei Kuo<sup>c,\*</sup>

<sup>a</sup>Department of Mechanical and Electro-Mechanical Engineering, National Sun Yat-Sen University, Kaohsiung 80424, Taiwan

<sup>b</sup>Department of Mechanical Engineering, University of California, Berkeley, California 94720, USA

<sup>c</sup>Department of Materials and Optoelectronic Science, Center for Nanoscience and Nanotechnology, National Sun Yat-Sen University, Kaohsiung 80424, Taiwan

Table S1. PVDF solutions used in this study

| PVDF                                |               | Solvent<br>(DMSO/Acetone) |             | Surfactant           |               |
|-------------------------------------|---------------|---------------------------|-------------|----------------------|---------------|
| Weight percentage<br>(PVDF/Solvent) | Weight<br>(g) | DMSO (g)                  | Acetone (g) | Weight<br>percentage | Weight<br>(g) |
| 15%                                 | 0.75          | 2.5                       | 2.5         | 5%                   | 0.25          |
| 16%                                 | 0.8           | 2.5                       | 2.5         | 5%                   | 0.25          |
| 17%                                 | 0.85          | 2.5                       | 2.5         | 5%                   | 0.25          |
| 18%                                 | 0.9           | 2.5                       | 2.5         | 5%                   | 0.25          |
| 19%                                 | 0.95          | 2.5                       | 2.5         | 5%                   | 0.25          |

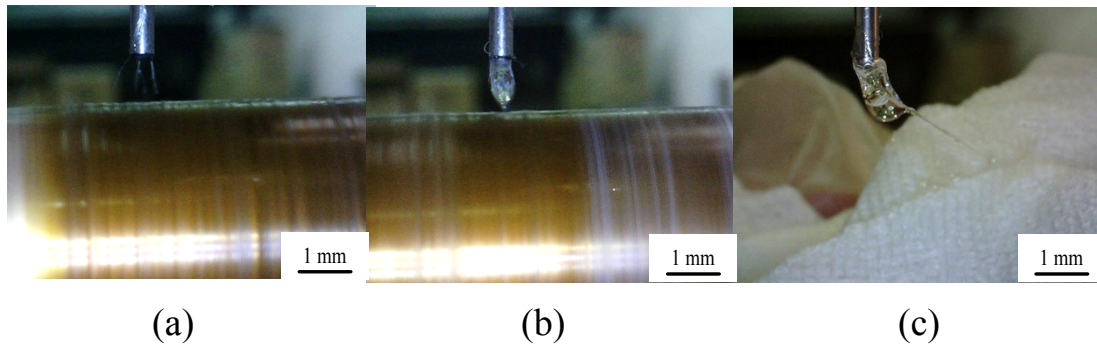

Figure S1. Electrospinning of fiber tubes failed when (a) the flow rate of the PVDF solution (outer needle) was less than 3mL/h, (b) the flow rate of the PVDF solution (outer needle) was greater than 3 mL/h, and (c) the flow rate of air (inner needle) was greater than 15 mL/h.
